# Supplementary material for: Supplementation of egg white peptides on attenuating skin mechanical damage symptoms: a promising way to accelerate wound healing process
Source: Royal Society of Chemistry journal article supplement (doi:10.1039/d1fo01525g), 2021-01-01

**Fig.S1** Pathological analysis of liver (**a**) and kidney (**b**) of experimental mice at days 3, 7, and 14 post-surgery. CK means the normal group mice without surgery; M means the model group mice with surgery only; L and H mean the post-surgery mice administrated with 200 mg/kg or 400 mg/kg egg white peptides, respectively.

**Fig.S2** HPLC chromatograms of a mixed standard solution of 20 amino acids (**a**) and serum samples in each experimental group (**b**). CK means the normal group mice without surgery; M means the model group mice with surgery only; L and H mean the post-surgery mice administrated with 200 mg/kg or 400 mg/kg egg white peptides, respectively. The letters “a-f” means significant different at day 3, 7, and 14 post-surgery among each type of amino acid with  $p < 0.05$ .

Fig. S1

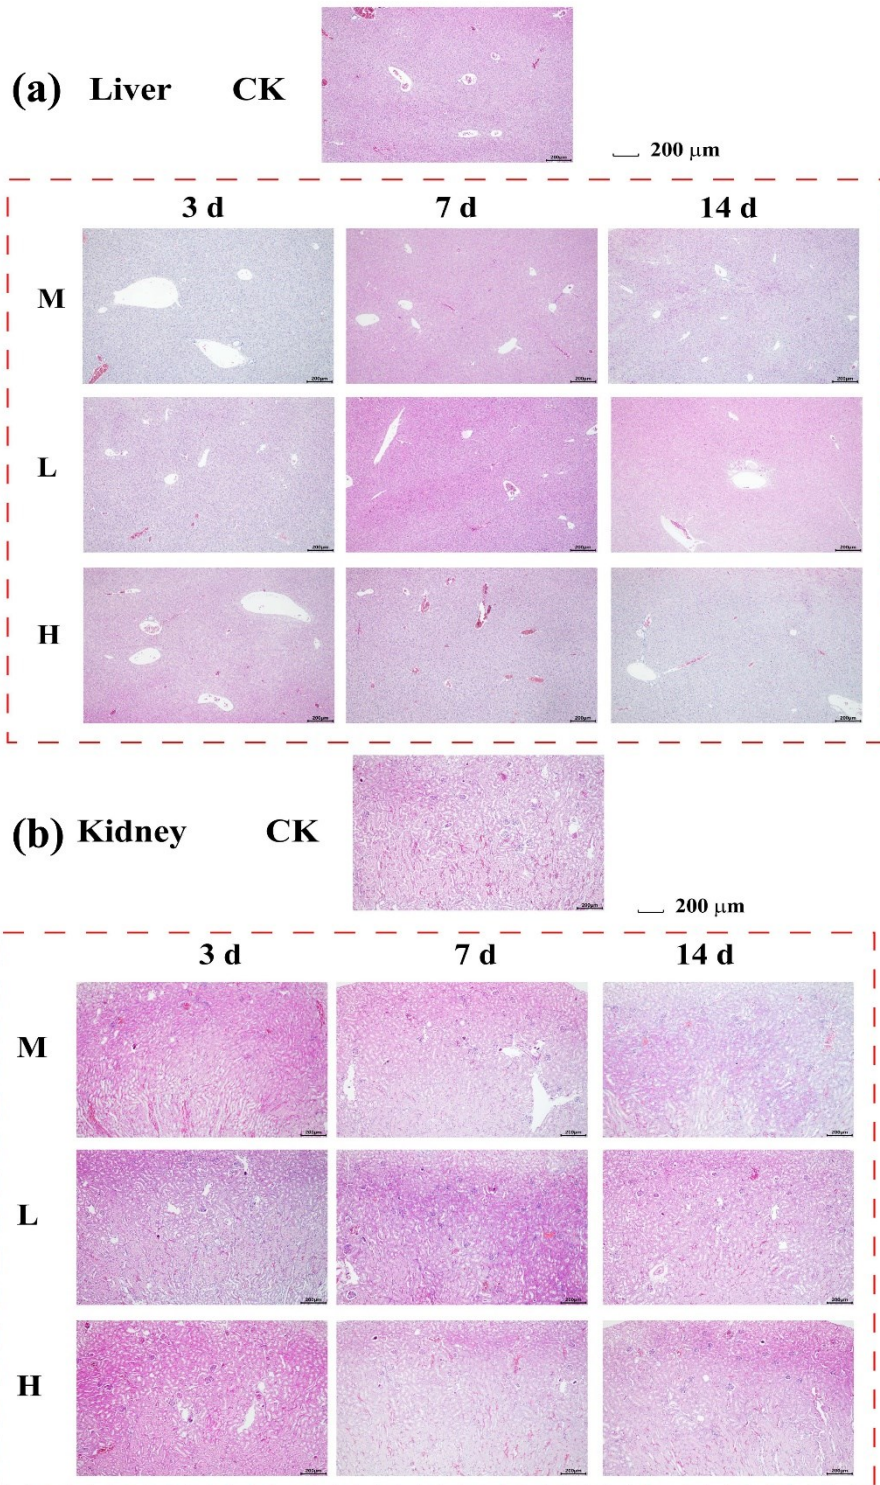

Fig. S2

(a)

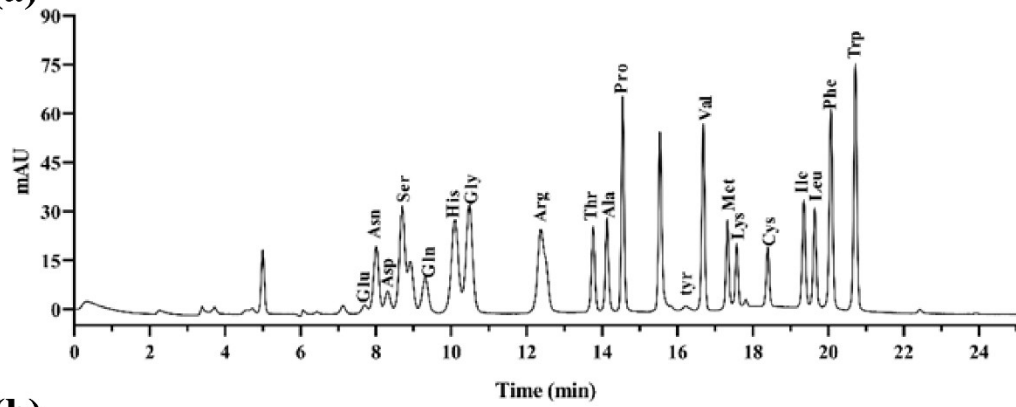

(b)

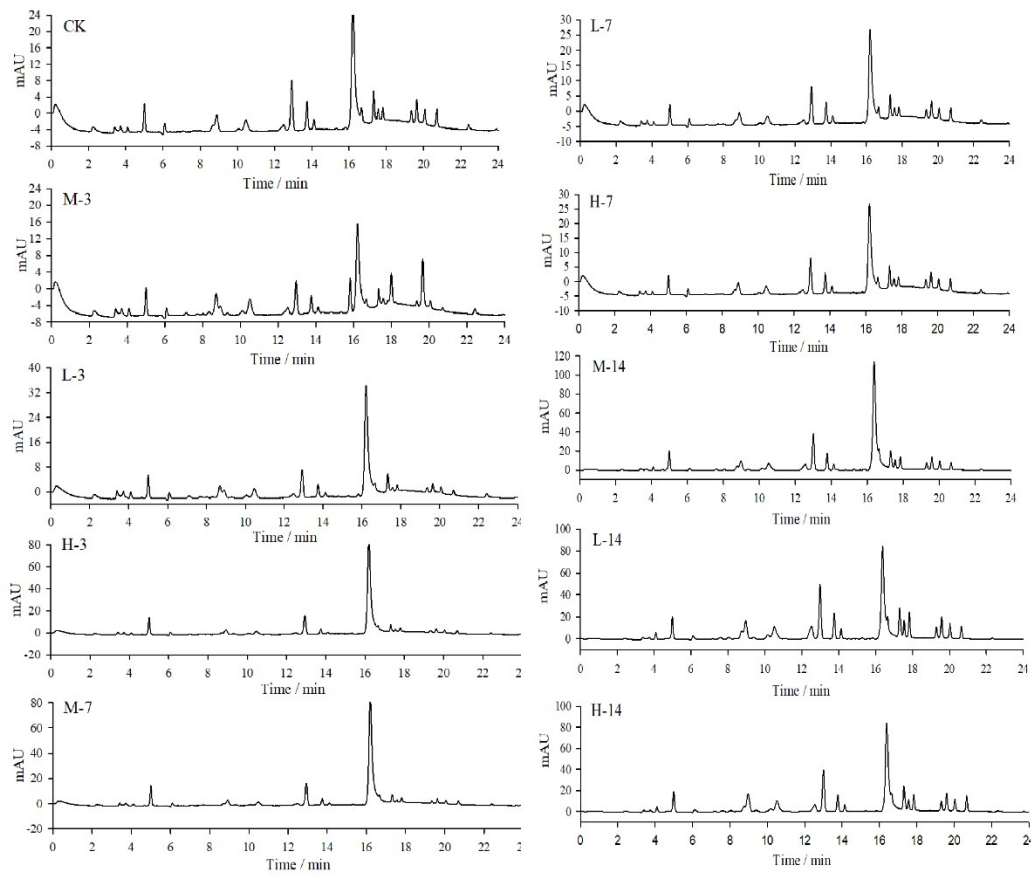

Supplement: d1fo01525g1.pdf [file d1fo01525g1.pdf]
